# Supplementary material for: Development and Validation of a LC–MS/MS-Based Assay for Quantification of Free and Total Omega 3 and 6 Fatty Acids from Human Plasma
Source: MDPI journal article supplement (doi:10.3390/molecules24020360), 2019-01-20
Supplement: s1 [file s1]

## Supplementary material 1

### **Bligh-Dyer lipid extraction method**

The methodology was adapted from Bligh-Dyer method [18]. Aliquots of 100  $\mu\text{L}$  plasma were transferred in Eppendorf tubes and mixed with 10  $\mu\text{L}$  of internal standard mixture containing 10  $\mu\text{g/mL}$  DHA-d5, ARA-d8 and or EPA-d5, and 10  $\mu\text{g/mL}$  LA-d4 and ALA-d1. 750  $\mu\text{L}$  of chloroform/methanol mixture (1:2, v/v). The tubes were vortexed and maintained at  $-20^{\circ}\text{C}$  for 10 min, then centrifuged at 14,000 g at  $4^{\circ}\text{C}$  for 5 min. The supernatant was transferred into a clean tube. 250  $\mu\text{L}$  of chloroform and 250  $\mu\text{L}$  water were added. The tubes were placed on a rotary mixer for 5 min and then centrifuged for 5 min at 1000 g.

The bottom layer was collected, transferred in a glass tubes and dried under nitrogen flow. 1 mL of 80% methanol was added, and the tubes were thoroughly mixed. Of this, a volume of 100  $\mu\text{L}$  was transferred into an autosampler vial for free fatty acids analysis. The remaining aliquot was subjected to alkaline hydrolysis as described in section 3.3.2.
