# Supplementary material for: Development and Validation of a LC–MS/MS-Based Assay for Quantification of Free and Total Omega 3 and 6 Fatty Acids from Human Plasma
Source: MDPI journal article supplement (doi:10.3390/molecules24020360), 2019-01-20
Supplement: s1 [file s1]

### Supplementary material 3

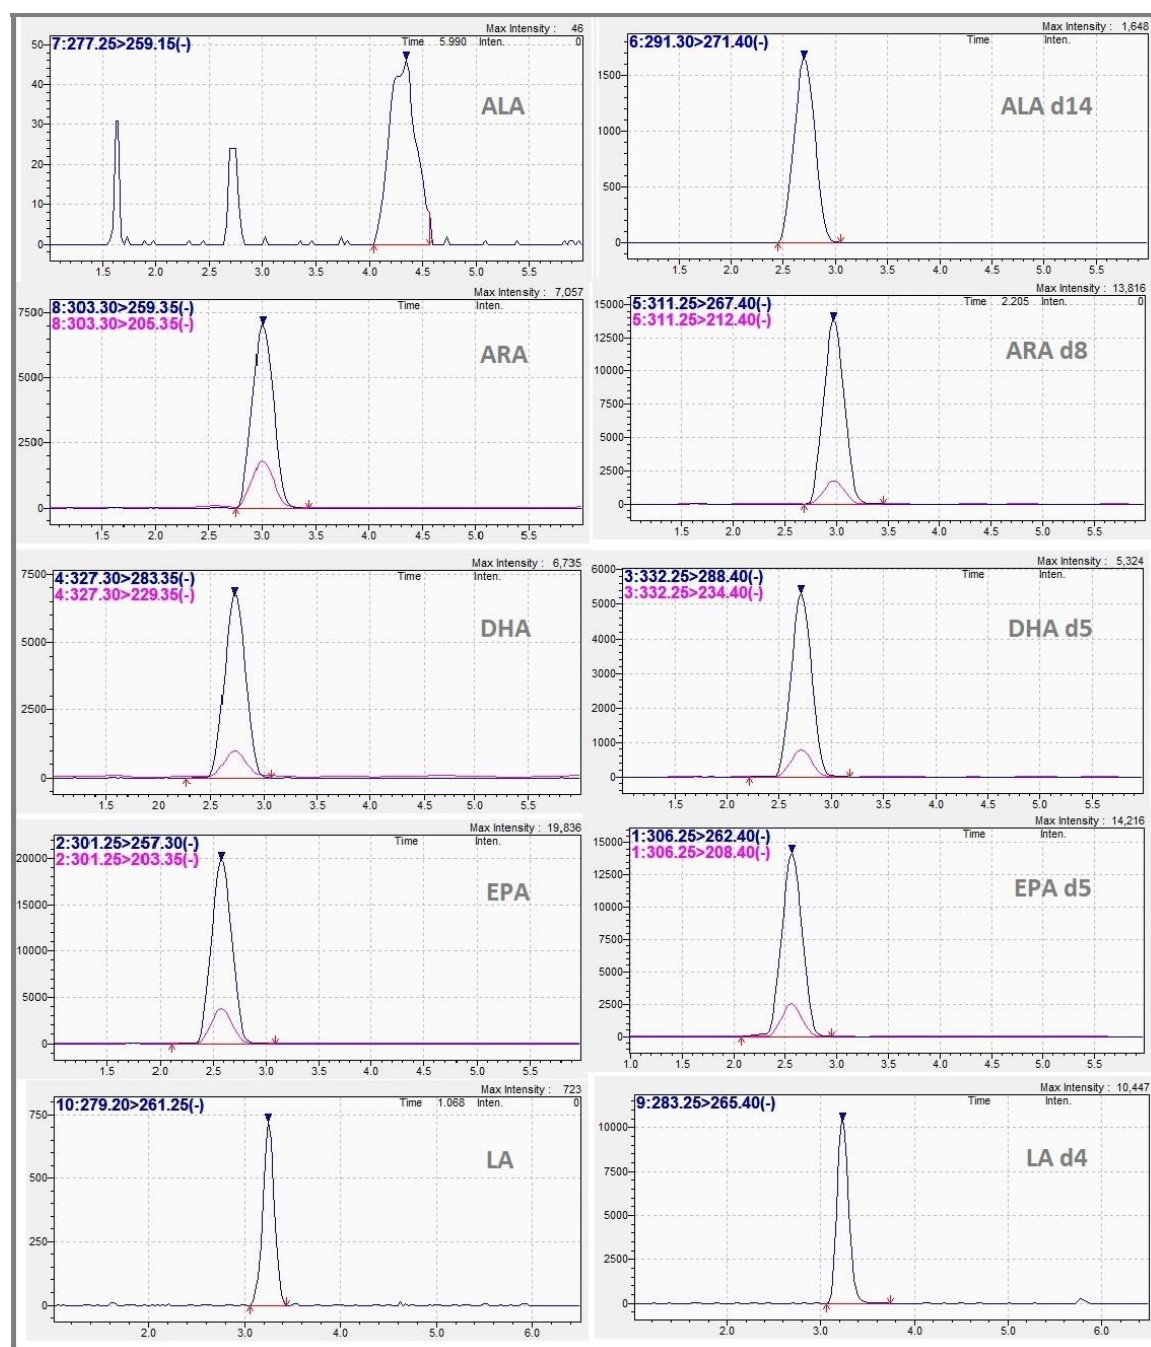

Figure S3. Evaluation of Acquity UPLC BEH C18 column. MRM chromatograms of ALA, ALA-d14, ARA, ARA-d8, DHA, DHA-d5, EPA, EPA-d5, LA and LA-d4 standards at concentration of 0.016, 0.2, 0.08, 0.1, 0.016, 0.1, 0.016, 0.1, 0.08 and 0.2  $\mu\text{g/mL}$  respectively.

Legend: ALA— $\alpha$ -linolenic acid, ARA—arachidonic acid, DHA—docosahexaenoic acid, EPA—eicosapentaenoic acid, LA—linoleic acid
