# Supplementary material for: Development and Validation of a LC–MS/MS-Based Assay for Quantification of Free and Total Omega 3 and 6 Fatty Acids from Human Plasma
Source: MDPI journal article supplement (doi:10.3390/molecules24020360), 2019-01-20
Supplement: s1 [file s1]

## Supplementary material 2

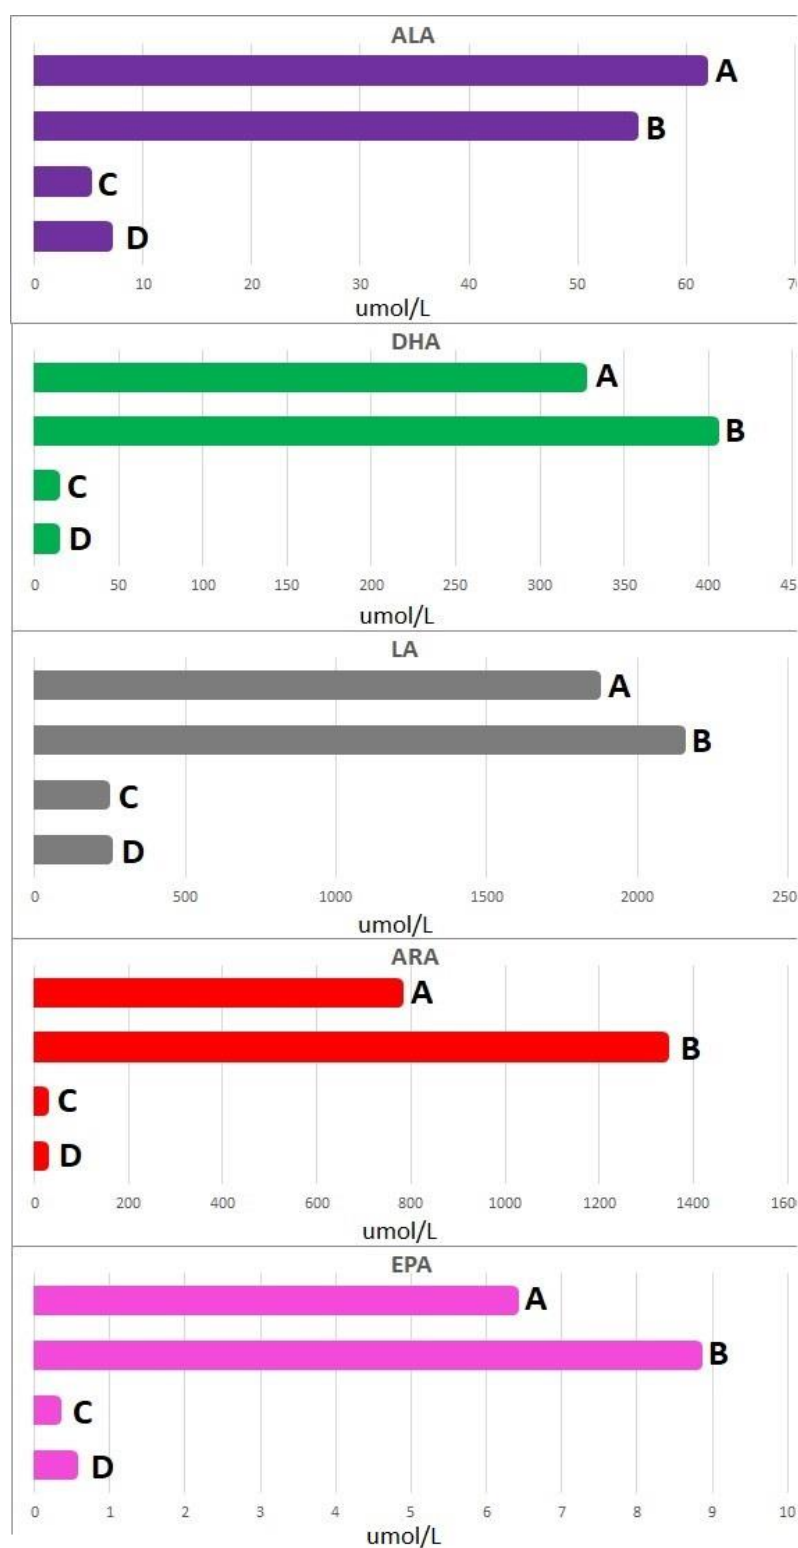

**Figure S2.** Evaluation of extraction protocol. Graphs show the levels of each FA in both free and total forms extracted with Bligh/Dyer method and hexane/isopropanol: A – FA from total lipids extracted using Bligh/Dyer method, B - FA from total lipids extracted with hexane/isopropanol, C – FA in free form extracted using Bligh/Dyer method, D – FA in free form extracted with hexane/isopropanol.

Legend: ALA— $\alpha$ -linolenic acid, ARA—arachidonic acid, DHA—docosahexaenoic acid, EPA—eicosapentaenoic acid, LA—linoleic acid
